# Supplementary material
Source: PubMed Central journal article supplement (PMC4529116)
Supplement: NIHMS705688-supplement-Supplemental_Fig__1.pdf [file NIHMS705688-supplement-Supplemental_Fig__1.pdf]

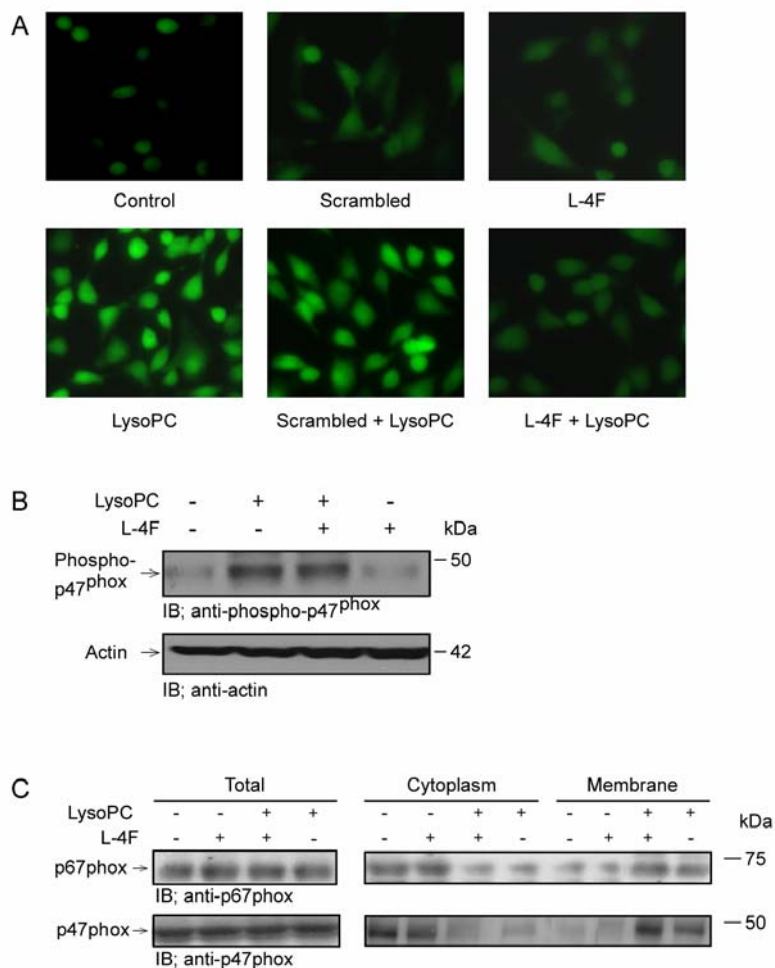

**Supplemental Fig. 1.** (A) L-4F, but not scrambled peptide, decreases lysoPC-induced ROS production in EC. EC were incubated with DCF-DA for 20 min, washed twice, and incubated with L-4F (0.43  $\mu\text{mol/L}$ ) or scrambled peptide (0.43  $\mu\text{mol/L}$ ) for 3 hours. LysoPC (12.5  $\mu\text{mol/L}$ ) was added and after 15 min, fluorescence was measured. (B) L-4F does not inhibit lysoPC induced NAD(P)H oxidase activation. Confluent EC were incubated with medium or L-4F for 3 hours, then washed and incubated with lysoPC (12.5  $\mu\text{mol/L}$ ) for 15 min. Immunoblot analysis for phosphorylated p47<sup>phox</sup> was performed (top panel). Blots were reprobbed for actin to verify equal loading of the lanes (bottom panel). Shown is a representative blot of three separate experiments. (C) L-4F does not inhibit lysoPC induced NAD(P)H oxidase subunit externalization. EC were incubated with L-4F for 3 hours and washed before addition of lysoPC (12.5  $\mu\text{mol/L}$ ) for 15 minutes. The cells were lysed and the cytosolic fraction was separated from the membrane fraction. Western blots were performed for p67<sup>phox</sup> (top panel) and p47<sup>phox</sup> (bottom panel).
